# Supplementary material for: Health-Related Quality of Life in Children With Congenital Hyperinsulinism
Source: PubMed Central journal article supplement (PMC6779698; doi:10.3389/fendo.2019.00670), 2019-10-01
Supplement: Table_1.pdf [file Table_1.pdf]

Supplemental Table 1. Parent-reported quality of life for 3-17-year-old patients in the persistent (P-CHI) or transient (T-CHI) CHI groups (n=65).

| Scale scores of KINDL-R <sup>a</sup> |                        | N  | Physical    | Emotional   | Self-esteem | Family      | Friends     | School      | Total       |
|--------------------------------------|------------------------|----|-------------|-------------|-------------|-------------|-------------|-------------|-------------|
|                                      |                        |    | mean (SD)   | mean (SD)   | mean (SD)   | mean (SD)   | mean (SD)   | mean (SD)   | mean (SD)   |
| 3 to 6 yr                            | P-CHI                  | 12 | 71.9 (21.7) | 80.7 (12.1) | 76.6 (11.0) | 72.9 (10.4) | 78.1 (9.4)  | 76.4 (15.0) | 76.1 (10.4) |
|                                      | T-CHI                  | 12 | 89.2 (9.1)  | 83.9 (10.1) | 77.6 (11.4) | 77.6 (11.4) | 81.8 (9.8)  | 80.7 (12.3) | 81.3 (6.3)  |
|                                      | Reference <sup>b</sup> |    | 80.2 (15.7) | 83.0 (11.4) | 80.7 (11.9) | 80.7 (11.9) | 79.7 (12.3) | 83.8 (12.5) | 80.0 (8.1)  |
| 7 to 10 yr                           | P-CHI                  | 6  | 85.4 (5.1)  | 80.2 (17.4) | 70.8 (3.2)  | 83.3 (7.6)  | 80.2 (10.8) | 88.5 (9.2)  | 81.4 (6.9)  |
|                                      | T-CHI                  | 13 | 87.0 (13.2) | 82.7 (10.9) | 75.0 (6.8)  | 80.8 (11.3) | 77.9 (15.0) | 90.4 (6.6)  | 82.3 (7.3)  |
|                                      | Reference <sup>c</sup> |    | 80.6 (16.3) | 82.7 (12.1) | 71.4 (13.2) | 79.9 (12.6) | 78.5 (13.0) | 83.1 (14.2) | 79.4 (9.1)  |
| 11 to 13 yr                          | P-CHI                  | 7  | 91.1 (8.0)  | 83.9 (8.0)  | 72.3 (3.3)  | 75.0 (10.8) | 78.6 (14.4) | 83.9 (8.7)  | 80.8 (4.1)  |
|                                      | T-CHI                  | 6  | 87.5 (9.7)  | 88.5 (4.7)  | 66.7 (10.2) | 86.5 (7.3)  | 79.2 (11.6) | 89.6 (7.6)  | 83.0 (5.5)  |
|                                      | Reference <sup>c</sup> |    | 76.1 (15.8) | 79.8 (12.8) | 68.1 (13.8) | 76.7 (14.6) | 77.1 (13.4) | 76.8 (14.8) | 75.7 (9.9)  |
| 14 to 17 yr                          | P-CHI                  | 8  | 87.5 (10.6) | 79.7 (11.9) | 78.1 (15.7) | 75.0 (18.3) | 80.5 (12.2) | 75.0 (17.0) | 79.3 (10.9) |
|                                      | T-CHI                  | 1  | 93.8 (0.0)  | 75.0 (0.0)  | 75.0 (0.0)  | 93.8 (0.0)  | 75.0 (0.0)  | 75.0 (0.0)  | 81.3 (0.0)  |
|                                      | Reference <sup>c</sup> |    | 73.3 (18.3) | 79.8 (13.1) | 67.2 (15.0) | 76.6 (15.2) | 78.2 (13.6) | 69.6 (15.7) | 74.1 (10.4) |

P-CHI, persistent CHI; T-CHI, transient CHI; <sup>a</sup> transformed scale scores ranging from 0 to 100, higher scores indicating better quality of life; <sup>b</sup> KiGGS study (Ravens-Sieberer et al., 2007); <sup>c</sup> BELLA study of the KiGGS (Ravens-Sieberer et al., 2008).

Supplemental Table 2. Self-reported quality of life for 7-17-year-old patients in the persistent (P-CHI) or transient (T-CHI) CHI groups (n=19).

| Scale scores ofr KINDL-R® |                        | N | Physical<br>mean (SD) | Emotional<br>mean (SD) | Self-esteem<br>mean (SD) | Family<br>mean (SD) | Friends<br>mean (SD) | School<br>mean (SD) | Total<br>mean (SD) |
|---------------------------|------------------------|---|-----------------------|------------------------|--------------------------|---------------------|----------------------|---------------------|--------------------|
| 11 to 13 yr               | P-CHI                  | 5 | 87.5 (7.7)            | 85.0 (7.1)             | 71.3 (3.4)               | 71.3 (9.5)          | 78.8 (10.5)          | 85.0 (9.5)          | 79.8 (4.7)         |
|                           | T-CHI                  | 5 | 78.8 (24.0)           | 85.0 (5.6)             | 70.0 (17.3)              | 87.5 (9.9)          | 82.5 (8.1)           | 82.5 (10.3)         | 81.0 (9.1)         |
|                           | Reference <sup>b</sup> |   | 76.1 (15.8)           | 79.8 (12.8)            | 68.1 (13.8)              | 76.7 (14.6)         | 77.1 (13.4)          | 76.8 (14.8)         | 75.7 (9.9)         |
| 14 to 17 yr               | P-CHI                  | 8 | 83.6 (10.5)           | 82.0 (7.0)             | 68.8 (13.8)              | 77.3 (17.3)         | 85.2 (10.5)          | 59.4 (16.4)         | 76.0 (9.4)         |
|                           | T-CHI                  | 1 | 81.3 (0.0)            | 75.0 (0.0)             | 68.8 (0.0)               | 100.0 (0.0)         | 81.3 (0.0)           | 81.3 (0.0)          | 81.3 (0.0)         |
|                           | Reference <sup>b</sup> |   | 73.3 (18.3)           | 79.8 (13.1)            | 67.2 (15.0)              | 76.6 (15.2)         | 78.2 (13.6)          | 69.6 (15.7)         | 74.1 (10.4)        |

P-CHI, persistent CHI; T-CHI, transient CHI; <sup>a</sup> transformed scale scores ranging from 0 to 100, higher scores indicating better quality of life; <sup>b</sup> BELLA study of the KiGGS (Ravens-Sieberer et al., 2008).
